# Supplementary material
Source: PubMed Central journal article supplement (PMC7243151)
Supplement: bloodBLD2019003807-suppl1.pdf [file bloodBLD2019003807-suppl1.pdf]

**Supplemental table 1: Intercorrelations between pathology findings.**

|                     | %GGS | %SGS | TH-BS | IFTA | ATI | Cort Infl | Med Infl | Int edema | tubulitis | Tub rupt | Int GC | TH extrav | GC react | Cort highest cast | Cort mean cast | Med highest cast | Med mean cast | Arterio scl | Art hyal | Amyloidosis -LCCD |
|---------------------|------|------|-------|------|-----|-----------|----------|-----------|-----------|----------|--------|-----------|----------|-------------------|----------------|------------------|---------------|-------------|----------|-------------------|
| %GGS                | -    |      |       |      |     |           |          |           |           |          |        |           |          |                   |                |                  |               |             |          |                   |
| %GSC                |      | -    |       |      |     |           |          |           |           |          |        |           |          |                   |                |                  |               |             |          |                   |
| TH-Bowman-S         |      |      | -     |      |     |           |          |           |           |          |        | 0.33      |          |                   |                |                  |               |             |          |                   |
| IFTA                |      |      |       | -    |     | 0.36      |          |           |           |          |        |           |          |                   |                |                  |               |             |          |                   |
| ATI                 |      |      |       |      | -   |           |          |           |           |          |        |           |          |                   |                |                  |               |             |          |                   |
| Cort Infl.          |      |      |       |      |     | -         | 0.43     | 0.43      | 0.33      | 0.28     |        |           |          |                   |                |                  |               |             |          |                   |
| Med Infl.           |      |      |       |      |     |           | -        | 0.34      |           |          |        |           |          |                   |                | 0.36             | 0.38          |             |          |                   |
| Int, edema          |      |      |       |      |     |           |          | -         | 0.44      | 0.31     |        |           |          |                   |                |                  |               |             |          |                   |
| tubulitis           |      |      |       |      |     |           |          |           | -         | 0.38     |        |           |          | 0.29              | 0.27           |                  |               |             |          |                   |
| Tub rupt            |      |      |       |      |     |           |          |           |           | -        | 0.35   | 0.28      | 0.33     |                   | 0.27           |                  |               |             |          |                   |
| Int GC              |      |      |       |      |     |           |          |           |           |          | -      |           | 0.37     |                   |                |                  |               |             |          |                   |
| TH extrav           |      |      |       |      |     |           |          |           |           |          |        | -         |          |                   |                |                  |               |             |          |                   |
| GC react            |      |      |       |      |     |           |          |           |           |          |        |           | -        | 0.28              | 0.36           | 0.33             | 0.36          |             |          |                   |
| Cort Max Cast*      |      |      |       |      |     |           |          |           |           |          |        |           |          | -                 | 0.90           |                  | 0.33          |             |          |                   |
| Cort Mean Cast*     |      |      |       |      |     |           |          |           |           |          |        |           |          |                   | -              | .40              | .46           |             |          |                   |
| Med Max Cast        |      |      |       |      |     |           |          |           |           |          |        |           |          |                   |                | -                | 0.92          |             |          |                   |
| Med Mean Cast       |      |      |       |      |     |           |          |           |           |          |        |           |          |                   |                |                  | -             |             |          |                   |
| Arteriosclerosis    |      |      |       |      |     |           |          |           |           |          |        |           |          |                   |                |                  |               | -           |          | 0.42              |
| Arteriolar Hyal     |      |      |       |      |     |           |          |           |           |          |        |           |          |                   |                |                  |               |             | -        |                   |
| Amyloidosis or LCDD |      |      |       |      |     |           |          |           |           |          |        |           |          |                   |                |                  |               |             |          | -                 |

Footnotes: Correlations between pathology variables were carried out using the Phi, Cramer's V or Spearman tests, appropriately. We reported coefficients only for statistically significant associations using the using the Holm–Bonferroni method. Arterioscl, indicates arteriosclerosis; Art hyal, arteriolar hyalinosis; ATI, acute tubular injury; Cort high cast, highest number of casts/mm<sup>2</sup> in the cortex; Cort Infl, cortical inflammation; Cort mean cast, mean number of casts /mm<sup>2</sup> in the cortex; IFTA: interstitial fibrosis and tubular atrophy; Int edema, interstitial edema;Int GC, interstitial giant cell; LCCD, light chain deposition disease; GC react, giant cell reaction around cast; GGS, global glomerulosclerosis, Med high cast, highest number of casts/mm<sup>2</sup> in the medulla; Med infl, medullary inflammation; Med mean cast, mean number of casts/mm<sup>2</sup> in the medulla; SGS: segmental glomerulosclerosis, TH-BS: Tamm Horsfall protein in the Bowman's space, TH extrav, Tamm Horsfall protein extravasation; Tub Rupt, tubular rupture.
